# Supplementary material
Source: HighWire-hosted journal article supplement (https://molpharm.aspetjournals.org/highwire/filestream/86674/field_highwire_adjunct_files/3/336_supp_data.pdf)
Supplement: 336_supp_data.pdf [file 336_supp_data.pdf]

## SUPPLEMENTAL MATERIAL

### Pharmacological characterization of the imipridone anti-cancer drug ONC201 reveals a negative allosteric mechanism of action at the D<sub>2</sub> dopamine receptor

R. Benjamin Free, Caroline A. Cuoco, Bing Xie, Yoon Namkung, Varun V. Prabhu, Blair K.A. Willette, Marilyn M. Day, Marta Sanchez-Soto, J. Robert Lane, Stéphane A. Laporte, Lei Shi, Joshua E. Allen, and David R. Sibley

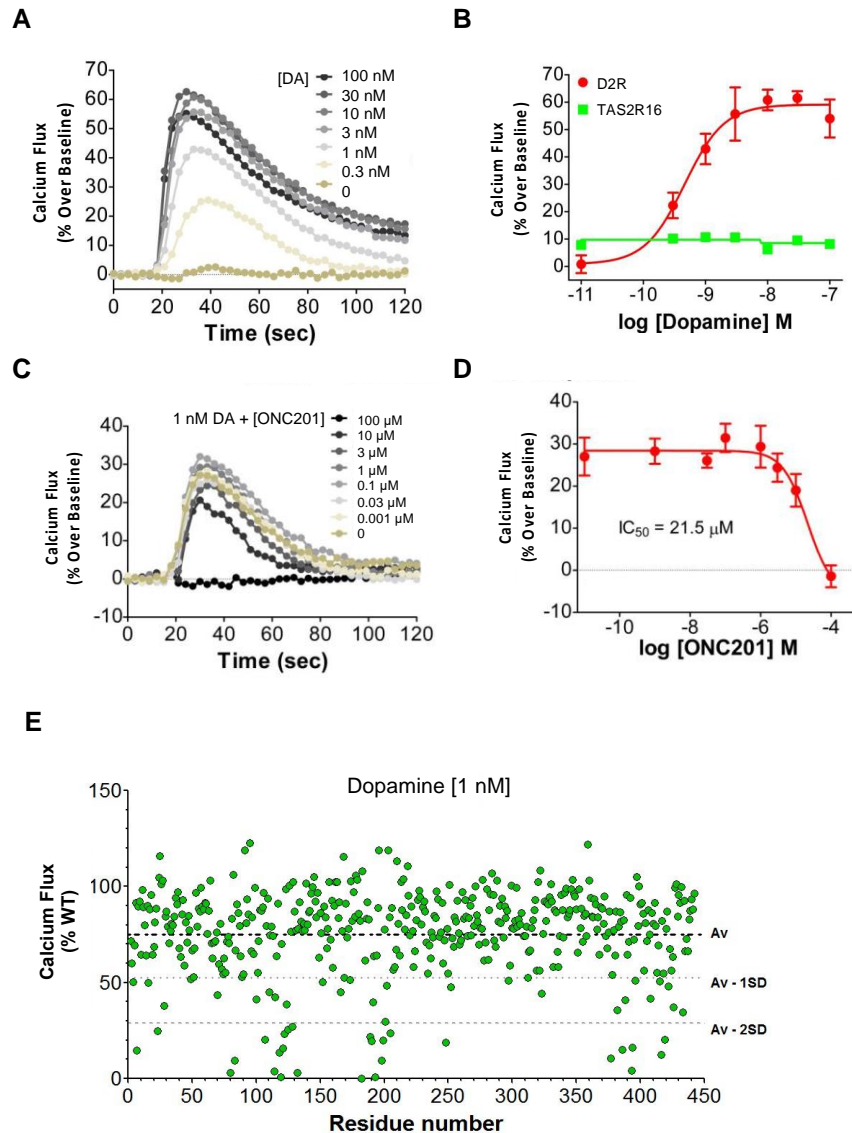

**Supplemental Figure S1. Scanning mutagenesis to determine critical residues for D<sub>2</sub>R-mediated Ca<sup>2+</sup> flux.** HEK293T cells were transiently transfected with the wild-type (WT) D<sub>2</sub>R or D<sub>2</sub>R mutants and a chimeric G $\alpha_{16}$  subunit. After 22 hr, Ca<sup>2+</sup> flux experiments were performed as described in the Materials and Methods. (A) Ca<sup>2+</sup> flux was measured over time

after the addition of the indicated concentrations of dopamine. **(B)** The peak responses from the D2R experiment in panel **A** were plotted as a function of the dopamine concentration yielding an  $EC_{50}$  of 0.45 nM.  $Ca^{2+}$  flux was also measured in response to dopamine in cells transfected with the bitter taste receptor TAS2R16. No significant response was observed. **(C)**  $Ca^{2+}$  flux was measured over time after the addition of 1 nM dopamine plus the indicated concentrations of ONC201. **(D)** Peak responses from the experiment in panel **C** were plotted as a function of the ONC201 concentration yielding an  $IC_{50}$  of 21.5  $\mu$ M. **(E)** The D2R alanine-scan mutant library (with wild-type alanines changed to serines) comprised 442 clones, covering residues 2 - 443 of the human D2R long isoform.  $Ca^{2+}$  flux was measured in response to 1 nM dopamine for each of the 442 D2R clones and expressed as a percentage of the wild-type D2R response. The data represent average values from three experiments. Mutant receptors were considered to be deficient in  $Ca^{2+}$  flux if they demonstrated flux values less than two standard deviations below the average  $Ca^{2+}$  flux value ( $AV - 2SD$ ) for the entire library. These mutant receptors are listed in Supplemental Table 1.

**Supplemental Table 1. GPCR abbreviations used in Figure 1B.**

| <b>Abbreviation</b> | <b>Receptor Name</b>                                           |
|---------------------|----------------------------------------------------------------|
| ADRA1B              | $\alpha_{1B}$ Adrenergic receptor                              |
| ADRA2A              | $\alpha_{2A}$ Adrenergic receptor                              |
| ADRA2B              | $\alpha_{2B}$ Adrenergic receptor                              |
| ADRA2C              | $\alpha_{2C}$ Adrenergic receptor                              |
| ADRB2               | $\beta_2$ Adrenergic receptor                                  |
| V1AR                | Arginine Vasopressin receptor 1A                               |
| V1BR                | Arginine Vasopressin receptor 1B                               |
| CALCRL-RAMP3        | Calcitonin receptor-like receptor activity modifying protein 3 |
| CCR1                | C-C Chemokine receptor type 1                                  |
| CCR3                | C-C Chemokine receptor type 3                                  |
| CCR4                | C-C Chemokine receptor type 4                                  |
| CCR5                | C-C Chemokine receptor type 5                                  |
| CCR8                | C-C Chemokine receptor type 8                                  |
| M3R                 | Muscarinic acetylcholine receptor 3                            |
| CB1R                | Cannabinoid receptor 1                                         |
| CB2R                | Cannabinoid receptor 2                                         |
| CX3CR1              | CX3C chemokine receptor 1                                      |
| CXCR4               | C-X-C chemokine receptor type 4                                |
| DRD1                | D1 dopamine receptor                                           |
| DRD2                | D2 dopamine receptor                                           |
| DRD3                | D3 dopamine receptor                                           |
| DRD4                | D4 dopamine receptor                                           |
| DRD5                | D5 dopamine receptor                                           |
| EDG4                | Lysophosphatidic acid receptor 2                               |
| EDG7                | Lysophosphatidic acid receptor 7                               |
| HR1                 | Histamine H1 receptor                                          |
| HR2                 | Histamine H2 receptor                                          |
| HR3                 | Histamine H3 receptor                                          |
| 5-HT1AR             | 5-hydroxytryptamine receptor 1A                                |
| 5-HT1BR             | 5-hydroxytryptamine receptor 1B                                |
| 5-HT1ER             | 5-hydroxytryptamine receptor 1E                                |
| 5-HT1FR             | 5-hydroxytryptamine receptor 1F                                |
| 5-HT2AR             | 5-hydroxytryptamine receptor 2A                                |
| 5-HT2CR             | 5-hydroxytryptamine receptor 2C                                |
| 5-HT5AR             | 5-hydroxytryptamine receptor 5A                                |
| MC5R                | Melanocortin receptor 5                                        |
| MCHR1               | Melanin-concentrating hormone receptor 1                       |
| KOR                 | Kappa opioid receptor                                          |
| MOR                 | Mu opioid receptor                                             |

|         |                                            |
|---------|--------------------------------------------|
| SSTR1   | Somatostatin receptor type 1               |
| SSTR3   | Somatostatin receptor type 3               |
| NK2R    | Tachykinin receptor/Substance-K receptor 2 |
| TRHR    | Thyrotropin-releasing hormone receptor     |
| TSHR(L) | Thyrotropin receptor                       |

**Supplemental Table 2. D2R mutants with highly reduced dopamine-stimulated Ca<sup>2+</sup> flux.**

| <b>D2R Mutation*</b> | <b>Ca<sup>2+</sup> Flux<br/>(% WT)</b> |
|----------------------|----------------------------------------|
| S7A                  | 15                                     |
| N23A                 | 25                                     |
| D80A                 | 3                                      |
| V83A                 | 10                                     |
| C107A                | 20                                     |
| D114A                | 4                                      |
| C118A                | 14                                     |
| T119A                | 1                                      |
| S121A                | 16                                     |
| I122A                | 23                                     |
| L125A                | 25                                     |
| R132A                | 3                                      |
| C182A                | 0                                      |
| I184A                | 0                                      |
| F189A                | 22                                     |
| V190A                | 20                                     |
| S193A                | 1                                      |
| S197A                | 0                                      |
| F198A                | 10                                     |
| Y199A                | 20                                     |
| T205A                | 24                                     |
| E248A                | 19                                     |
| I377A                | 11                                     |
| W386A                | 15                                     |
| H393A                | 4                                      |
| I394A                | 16                                     |
| Y416A                | 12                                     |
| S419A                | 20                                     |

\*Residues were identified from the analysis shown in **Supplemental Fig. 1E**. D2R mutants were considered to be deficient in Ca<sup>2+</sup> flux if they demonstrated flux values less than 2 standard deviations below the average Ca<sup>2+</sup> flux value (AV – 2SD) for the entire library. Data represent the % Ca<sup>2+</sup> flux seen in response to 1 nM dopamine for the wild-type (WT) D2R.

**Supplemental Data File 1:** D2R\_ONC201\_inactive.pdb

**Supplemental Data File 2:** D2R\_ONC\_active\_pose1.pdb

**Supplemental Data File 3:** D2R\_ONC\_active\_pose2.pdb
